# Supplementary material
Source: ML conference proceedings conference paper supplement (https://proceedings.neurips.cc/paper_files/paper/2022/hash/0d18ab3b5fabfa6fe47c62e711af02f0-Abstract.html)
Supplement: Supplementary file 1 [file 0d18ab3b5fabfa6fe47c62e711af02f0-Supplemental-Conference.pdf]

## A Appendix

### A.1 Performance breakdown for categories

In table 1, we report the performance on each category. It is shown that our DeepInteraction performs the best among all the competitors across the most of object categories.

Table 1: Comparison with state-of-the-art methods on the nuScenes test set. Metrics: mAP(%) $\uparrow$ , NDS(%) $\uparrow$ , and AP(%) $\uparrow$  for each category. ‘C.V.’, ‘Ped.’, and ‘T.C.’, ‘M.T.’ and ‘T.L.’ are short for construction vehicle, pedestrian, traffic cone, motor and trailer respectively. ‘L’ and ‘C’ represent LiDAR and camera, respectively.  $\dagger$  denotes test-time augmentation is used.  $\S$  denotes that test-time augmentation and model ensemble both are applied for testing.

| Method                                           | Mod. | mAP         | NDS         | Car         | Truck       | C.V.        | Bus         | T.L.        | B.R.        | M.T.        | Bike        | Ped.        | T.C.        |
|--------------------------------------------------|------|-------------|-------------|-------------|-------------|-------------|-------------|-------------|-------------|-------------|-------------|-------------|-------------|
| CenterPoint [9] $\dagger$                        | L    | 60.3        | 67.3        | 85.2        | 53.5        | 20.0        | 63.6        | 56.0        | 71.1        | 59.5        | 30.7        | 84.6        | 78.4        |
| Focals Conv [2]                                  | L    | 63.8        | 70.0        | 86.7        | 56.3        | 23.8        | 67.7        | 59.5        | 74.1        | 64.5        | 36.3        | 87.5        | 81.4        |
| TransFusion-L [1]                                | L    | 65.5        | 70.2        | 86.2        | 56.7        | 28.2        | 66.3        | 58.8        | 78.2        | 68.3        | 44.2        | 86.1        | 82.0        |
| LargeKernel [3]                                  | L    | 65.3        | 70.5        | 85.9        | 55.3        | 26.8        | 66.2        | 60.2        | 74.3        | 72.5        | 46.6        | 85.6        | 80.0        |
| PointAug. [7] $\dagger$                          | L+C  | 66.8        | 71.0        | 87.5        | 57.3        | 28.0        | 65.2        | 60.7        | 72.6        | 74.3        | 50.9        | 87.9        | 83.6        |
| MVP [10]                                         | L+C  | 66.4        | 70.5        | 86.8        | 58.5        | 26.1        | 67.4        | 57.3        | 74.8        | 70.0        | 49.3        | 89.1        | 85.0        |
| FusionPainting [8]                               | L+C  | 68.1        | 71.6        | 87.1        | 60.8        | 30.0        | 68.5        | 61.7        | 71.8        | 74.7        | 53.5        | 88.3        | 85.0        |
| AutoAlign [4]                                    | L+C  | 68.4        | 72.4        | 87.0        | 59.0        | 33.1        | 69.3        | 59.3        | 78.0        | 72.9        | 52.1        | 87.6        | 85.1        |
| FUTR3D [4]                                       | L+C  | 68.4        | 72.4        | 87.0        | 59.0        | 33.1        | 69.3        | 59.3        | 78.0        | 72.9        | 52.1        | 87.6        | 85.1        |
| TransFusion [1]                                  | L+C  | 68.9        | 71.7        | 87.1        | 60.0        | 33.1        | 68.3        | 60.8        | 78.1        | 73.6        | 52.9        | 88.4        | 86.7        |
| BEVFusion [5]                                    | L+C  | 69.2        | 71.8        | 88.1        | 60.9        | 34.4        | 69.3        | 62.1        | 78.2        | 72.2        | 52.2        | 89.2        | 85.5        |
| BEVFusion [6]                                    | L+C  | 70.2        | 72.9        | <b>88.6</b> | 60.1        | <b>39.3</b> | 69.8        | <b>63.8</b> | 80.0        | 74.1        | 51.0        | 89.2        | 86.5        |
| <b>DeepInteraction-base</b>                      | L+C  | <b>70.8</b> | <b>73.4</b> | 87.9        | <b>60.2</b> | 37.5        | <b>70.8</b> | <b>63.8</b> | <b>80.4</b> | <b>75.4</b> | <b>54.5</b> | <b>91.7</b> | <b>87.2</b> |
| Focals Conv-F [2] $\dagger$                      | L+C  | 70.1        | 73.6        | 87.5        | 60.0        | 32.6        | 69.9        | 64.0        | 71.8        | 81.1        | 59.2        | 89.0        | 85.5        |
| LargeKernel3D-F [3] $\dagger$                    | L+C  | 71.1        | 74.2        | 88.1        | 60.3        | 34.3        | 69.1        | <b>66.5</b> | 75.5        | 82.0        | 60.3        | 89.6        | 85.7        |
| <b>DeepInteraction-large<math>\dagger</math></b> | L+C  | <b>74.1</b> | <b>75.5</b> | <b>88.8</b> | <b>64.0</b> | <b>40.8</b> | <b>70.9</b> | 62.7        | <b>82.3</b> | <b>85.3</b> | <b>64.5</b> | <b>92.6</b> | <b>89.3</b> |
| BEVFusion-e [6] $\S$                             | L+C  | 75.0        | 76.1        | <b>90.5</b> | <b>65.8</b> | 42.6        | <b>74.2</b> | <b>67.4</b> | 81.1        | 84.4        | 62.9        | 91.8        | 89.4        |
| <b>DeepInteraction-e<math>\S</math></b>          | L+C  | <b>75.7</b> | <b>76.3</b> | 89.0        | 64.5        | <b>44.7</b> | <b>74.2</b> | 66.0        | <b>83.5</b> | <b>85.4</b> | <b>66.4</b> | <b>92.8</b> | <b>90.9</b> |

### A.2 Discussions of potential societal impacts

Fusing multi-modal information allows to compensate for the shortcomings of single modality in 3D object detection, leading to more accurate and robust performance. In practice, a stronger 3D object detection method as our DeepInteraction model is expected to reduce the potential accidents of self-driving cars. This improves the safety and reliability of autonomous driving. However, multi-modal algorithms often require more powerful computing devices and run at a higher cost. This raises a need for improving the system efficiency to be resolved in the future.

### A.3 Limitations

All the components for multi-modal fusion in our DeepInteraction have no preference to any per-modal representations. However, the initial queries are derived from LiDAR BEV, albeit fused with image features. We will explore how to generate initial queries from both modalities (*i.e.*, LiDAR’s bird-eyes-view and camera’s front-view).

Our method involves explicit 2D-3D mapping, hence is conditioned on the calibration quality of the sensors. To relax this condition, a potential method is to exploit the attention mechanism to allow the network to automatically establish alignment between multi-modal features.

Finally, our current model design does not take into account model efficiency. In the future, we will develop a more advanced framework which can adaptively select more cost-effective combinations of interaction operators in order to optimize the trade-off between performance, efficiency and robustness.

#### A.4 More visualizations

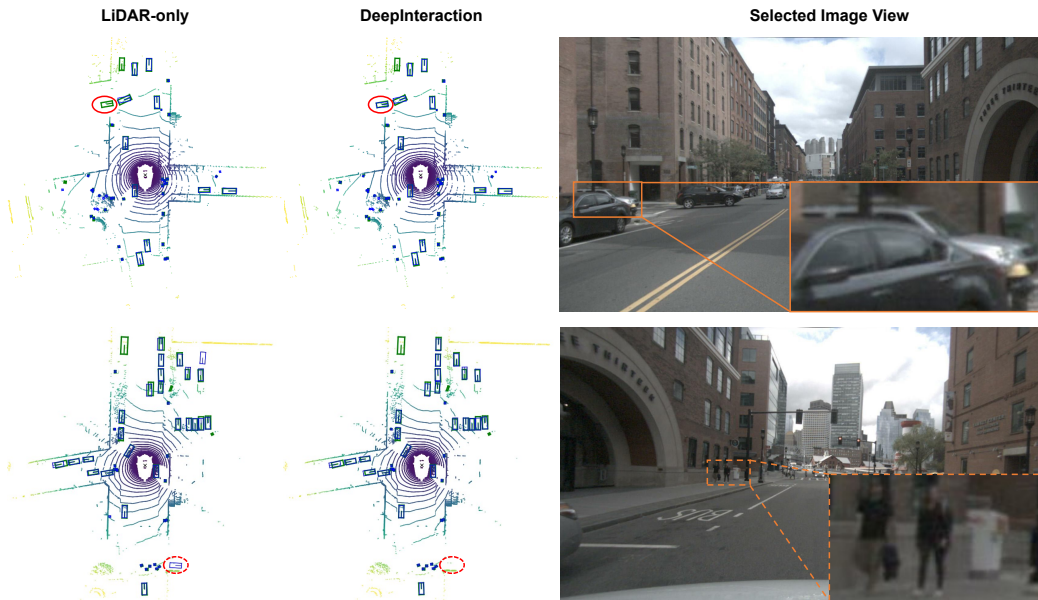

Figure 1: Qualitative comparison between LiDAR-only baseline and our DeepInteraction. Blue boxes and green boxes are the predictions and ground-truth, respectively. Solid eclipse indicates false negative, and dashed eclipse indicates false positive.

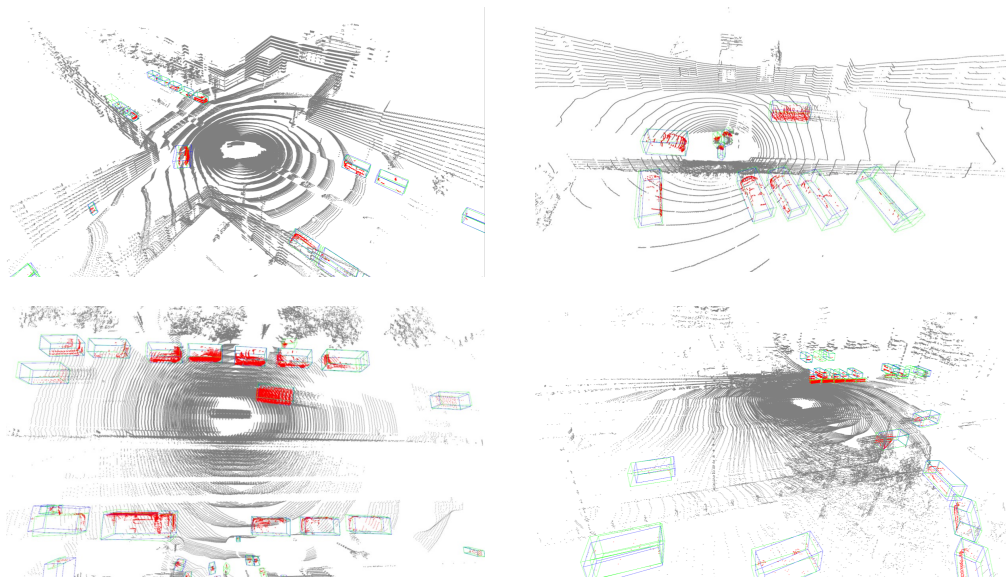

Figure 2: Detection results shown in point clouds by DeepInteraction on nuScenes val set. The bounding boxes of ground-truth and predictions are in the color blue and green respectively. Best viewed on screen.

#### References

- [1] Xuyang Bai, Zeyu Hu, Xinge Zhu, Qingqiu Huang, Yilun Chen, Hongbo Fu, and Chiew-Lan Tai. Transfusion: Robust lidar-camera fusion for 3d object detection with transformers. In *CVPR*, 2022. 1

- [2] Yukang Chen, Yanwei Li, Xiangyu Zhang, Jian Sun, and Jiaya Jia. Focal sparse convolutional networks for 3d object detection. *arXiv preprint*, 2022. 1
- [3] Yukang Chen, Jianhui Liu, Xiaojuan Qi, Xiangyu Zhang, Jian Sun, and Jiaya Jia. Scaling up kernels in 3d cnns. *arXiv preprint*, 2022. 1
- [4] Zehui Chen, Zhenyu Li, Shiquan Zhang, Liangji Fang, Qinghong Jiang, Feng Zhao, Bolei Zhou, and Hang Zhao. Autoalign: Pixel-instance feature aggregation for multi-modal 3d object detection. *arXiv preprint*, 2022. 1
- [5] Tingting Liang, Hongwei Xie, Kaicheng Yu, Zhongyu Xia, Zhiwei Lin, Yongtao Wang, Tao Tang, Bing Wang, and Zhi Tang. BEVFusion: A Simple and Robust LiDAR-Camera Fusion Framework. *arXiv preprint*, 2022. 1
- [6] Zhijian Liu, Haotian Tang, Alexander Amini, Xingyu Yang, Huizi Mao, Daniela Rus, and Song Han. Bevfusion: Multi-task multi-sensor fusion with unified bird’s-eye view representation. *arXiv preprint*, 2022. 1
- [7] Chunwei Wang, Chao Ma, Ming Zhu, and Xiaokang Yang. Pointaugmenting: Cross-modal augmentation for 3d object detection. In *CVPR*, 2021. 1
- [8] Shaoqing Xu, Dingfu Zhou, Jin Fang, Junbo Yin, Bin Zhou, and Liangjun Zhang. Fusion-Painting: Multimodal fusion with adaptive attention for 3d object detection. *ITSC*, 2021. 1
- [9] Tianwei Yin, Xingyi Zhou, and Philipp Krahenbuhl. Center-based 3d object detection and tracking. In *CVPR*, 2021. 1
- [10] Tianwei Yin, Xingyi Zhou, and Philipp Krähenbühl. Multimodal virtual point 3d detection. *NeurIPS*, 2021. 1
